# Supplementary material
Source: PubMed Central journal article supplement (PMC6507429)

# Nanoparticle Wettability Influences Nanoparticle–Phospholipid Interactions

## Online Supplement

Nagarjun V. Konduru <sup>a,b</sup>, Flavia Damiani <sup>a</sup>, Svetla Stoilova-McPhie <sup>c</sup>, Jason S. Tresback <sup>c</sup>,  
Georgios Pyrgiotakis <sup>a,b</sup> Thomas C. Donaghey <sup>a,b</sup>, Philip Demokritou <sup>a,b</sup>, Joseph D. Brain <sup>a,b</sup>,  
Ramon M. Molina <sup>a,b</sup> §

<sup>a</sup> Molecular and Integrative Physiological Sciences Program, Department of Environmental Health, Harvard T.H. Chan School of Public Health, 665 Huntington Avenue, Boston, MA 02115, USA.

<sup>b</sup> Center for Nanotechnology and Nanotoxicology, Harvard T.H. Chan School of Public Health, 665 Huntington Avenue, Boston, MA 02115, USA.

<sup>c</sup> Center for Nanoscale Systems, Faculty of Art and Sciences, Harvard University, 11 Oxford Street, Cambridge, MA, 02138, USA.

Corresponding Author:

§ Ramon M. Molina, Molecular and Integrative Physiological Sciences Program, Harvard Department of Environmental Health, School of Public Health, 665 Huntington Avenue, Boston, MA 02115, USA. Tel: 617-432-2311

**Email: [rmolina@hsph.harvard.edu](mailto:rmolina@hsph.harvard.edu)**

**Table S1.** Tandem quadruple mass spectroscopic analysis of phospholipid from rat BAL fluid and of extracted phospholipids from nanoparticle surface after incubation in cell-free rat alveolar lavage fluid at 37°C for 30 minutes.

**A. Phosphatidylcholine** (Data are ng phospholipid bound per mg nanoparticles. Blank cells indicate not detectable)

| <b>Compound</b> | <b>Rat BALf<br/>(µg/ml)</b> | <b>CeO<sub>2</sub></b> | <b>Si-CeO<sub>2</sub></b> | <b>BaSO<sub>4</sub></b> | <b>ZnO</b> |
|-----------------|-----------------------------|------------------------|---------------------------|-------------------------|------------|
| C14:0           | 0.02                        | 2.93                   | 4.21                      | 0.52                    | 5.15       |
| C16:0e          |                             |                        |                           | 0.68                    | 1.35       |
| C16:1           |                             |                        | 0.68                      |                         |            |
| C16:0           | 0.41                        | 158.19                 | 146.18                    | 72.89                   | 192.12     |
| C18:2           |                             |                        |                           |                         | 6.16       |
| C18:1           |                             |                        |                           |                         | 3.89       |
| C18:0           |                             | 33.68                  | 25.74                     | 17.21                   | 35.36      |
| C20:4           |                             | 4.63                   | 3.12                      | 1.85                    | 3.95       |
| C22:6           |                             | 4.97                   | 2.29                      | 2.71                    | 2.79       |
| C30:1e          | 0.01                        | 2.25                   | 1.66                      | 1.85                    | 2.67       |
| C30:0e          | 0.1                         | 32.71                  | 31.13                     |                         |            |
| C30:1           | 0.70                        | 256.41                 | 186.81                    | 120.09                  | 198.33     |
| C32:3           | 0.25                        | 13.10                  | 6.22                      | 5.10                    | 12.57      |
| C32:2           | 3.22                        | 228.18                 | 91.68                     | 136.68                  | 285.63     |
| C32:1           | 28.84                       | 3163.16                | 1667.18                   | 1994.94                 | 3823.13    |
| C32:0           | 82.94                       | 33972.09               | 23902.62                  | 19225.14                | 38472.62   |
| C34:3e          |                             | 5.24                   | 2.35                      |                         | 2.52       |
| C34:1e          |                             | 11.86                  | 6.53                      | 4.42                    | 6.91       |
| C34:4           | 0.25                        | 10.69                  |                           | 5.75                    | 11.84      |
| C34:3           | 1.71                        | 143.32                 | 64.02                     | 84.37                   | 142.53     |
| C34:2           | 20.91                       | 1404.68                | 624.24                    | 802.32                  | 1560.20    |
| C34:1           | 9.95                        | 750.49                 | 362.89                    | 461.80                  | 917.95     |
| C34:0           | 4.05                        | 629.67                 | 474.02                    | 336.97                  | 761.64     |
| C36:4e          |                             | 3.82                   |                           | 2.50                    | 5.21       |
| C36:6           | 0.05                        |                        |                           |                         | 1.36       |
| C36:5           | 1.44                        | 61.06                  | 27.04                     | 31.92                   | 58.67      |
| C36:4           | 4.93                        | 363.16                 | 169.57                    | 224.25                  | 441.23     |
| C36:3           | 1.18                        | 42.37                  | 23.91                     | 30.43                   | 56.53      |
| C36:2           | 3.87                        | 127.99                 | 70.69                     | 42.90                   | 95.64      |
| C36:1           | 0.70                        |                        | 19.63                     | 10.87                   | 13.28      |
| C36:0           |                             |                        |                           |                         |            |
| C38:6e          | 5.68                        | 11.26                  | 7.47                      | 8.27                    | 16.35      |
| C38:6           | 2.52                        | 174.69                 | 73.02                     | 85.76                   | 168.94     |

|           |      |          |          |          |          |
|-----------|------|----------|----------|----------|----------|
| C38:5     | 1.08 | 43.82    | 19.02    | 22.36    | 40.13    |
| C38:4     | 1.82 | 69.06    | 33.66    | 34.86    | 80.32    |
| C38:1     |      | 40.86    | 25.47    | 19.29    | 32.54    |
| C40:8     | 0.20 | 3.47     | 2.00     | 1.86     | 4.28     |
| C40:7     |      |          | 2.29     | 1.26     | 2.26     |
| C40:6     | 0.49 | 15.69    | 10.06    | 7.90     | 18.43    |
| C40:5     | 0.53 |          | 3.82     |          | 7.78     |
| C40:1     |      | 2.52     |          |          | 1.05     |
| Total LPC |      | 204.39   | 182.22   | 95.86    | 250.77   |
| Total PC  |      | 41583.64 | 27909.00 | 23703.85 | 47242.55 |

**B. Phosphatidylethanolamine** (Data are ng phospholipid bound per mg nanoparticles. Blank cells indicate not detectable)

| Compound        | Rat BALf<br>( $\mu\text{g/ml}$ ) | CeO <sub>2</sub> | Si-CeO <sub>2</sub> | BaSO <sub>4</sub> | ZnO   |
|-----------------|----------------------------------|------------------|---------------------|-------------------|-------|
| C14:0           |                                  |                  | 0.02                | 0.01              |       |
| C16:1           |                                  | 0.07             | 0.09                | 0.04              |       |
| C16:0           |                                  | 0.79             | 0.66                | 0.62              | 0.47  |
| C18:2           |                                  |                  |                     | 0.02              | 0.10  |
| C18:1           |                                  | 0.08             | 0.06                | 0.04              | 0.12  |
| C18:0           |                                  | 0.74             | 0.43                | 0.30              | 0.62  |
| C20:4           |                                  | 0.06             | 0.03                | 0.03              | 0.08  |
| C22:6           |                                  | 0.06             | 0.05                | 0.04              | 0.09  |
| C22:4           |                                  | 0.02             | 0.01                | 0.01              | 0.02  |
| C34:2p / C34:3e |                                  | 0.95             | 1.14                | 0.54              | 0.82  |
| C34:3           |                                  | 2.02             | 1.24                | 1.82              | 3.79  |
| C34:2           |                                  | 20.82            | 13.80               | 17.34             | 42.17 |
| C34:1           |                                  | 37.17            | 19.75               | 24.42             | 44.01 |
| C34:0           |                                  |                  | 2.63                |                   |       |
| C36:4p / C36:5e |                                  | 2.85             | 1.72                | 1.29              | 4.31  |
| C36:3p / C36:2e |                                  | 1.76             | 1.60                | 1.27              | 2.81  |
| C36:6           |                                  | 0.31             | 0.21                | 0.18              | 0.36  |
| C36:5           | 0.40                             | 3.94             | 2.15                | 3.17              | 6.58  |
| C36:4           |                                  | 26.09            | 15.40               | 22.71             | 43.08 |
| C36:3           |                                  | 4.46             | 1.89                | 3.24              | 6.91  |
| C36:2           |                                  | 1.88             | 1.89                | 4.62              | 18.01 |
| C36:1           |                                  | 8.03             | 3.55                | 4.13              | 8.90  |
| C38:5p / C38:6e |                                  | 3.71             | 3.10                | 3.02              | 4.27  |
| C38:6           | 4.10                             | 17.18            | 11.76               | 11.83             | 22.65 |
| C38:5           |                                  | 9.93             | 5.92                | 8.74              | 15.55 |
| C38:4           | 0.45                             | 13.96            | 8.28                | 11.36             | 23.89 |
| C38:3           |                                  | 1.26             | 0.55                | 0.40              | 1.25  |
| C40:8           |                                  | 0.30             |                     | 0.19              | 0.28  |
| C40:7           |                                  | 1.60             | 0.90                | 1.42              | 2.22  |

|           |  |        |        |        |        |
|-----------|--|--------|--------|--------|--------|
| C40:6     |  | 4.46   | 3.40   | 3.89   | 6.37   |
| C40:5     |  | 2.02   | 0.86   | 1.28   | 3.15   |
| C40:4     |  | 1.67   | 0.96   | 1.04   | 2.43   |
| C40:1     |  | 0.09   | 0.09   | 0.11   | 0.16   |
| Total LPE |  | 1.81   | 1.35   | 1.12   | 1.49   |
| Total PE  |  | 166.45 | 102.81 | 128.00 | 263.96 |

**C. Phosphatidylinositol** (Data are ng phospholipid bound per mg nanoparticles. Blank cells indicate not detectable)

| Compound  | Rat BALf<br>( $\mu\text{g/ml}$ ) | CeO <sub>2</sub> | Si-CeO <sub>2</sub> | BaSO <sub>4</sub> | ZnO    |
|-----------|----------------------------------|------------------|---------------------|-------------------|--------|
| C32:2     | 0.80                             | 2.63             |                     | 0.92              | 2.04   |
| C32:1     |                                  | 15.13            | 6.43                | 6.06              | 13.02  |
| C34:2     |                                  | 96.66            | 54.59               | 49.90             | 83.57  |
| C34:1     | 0.48                             | 39.61            | 24.14               | 23.73             | 34.24  |
| C34:0     |                                  | 25.93            | 16.75               |                   | 15.15  |
| C36:5     |                                  | 9.18             | 3.12                | 4.11              | 4.37   |
| C36:4     | 0.53                             | 48.50            | 17.77               | 21.10             | 34.03  |
| C36:3     | 0.70                             | 17.90            |                     | 6.42              | 13.42  |
| C36:2     | 1.23                             | 48.37            | 19.16               | 24.58             | 39.93  |
| C36:1     |                                  |                  |                     | 9.52              | 12.44  |
| C38:6     | 0.95                             | 148.20           | 78.73               | 57.48             | 90.09  |
| C38:5     | 0.58                             | 40.46            |                     | 18.90             | 26.78  |
| C38:4     | 1.13                             | 54.30            | 18.06               | 29.13             | 43.98  |
| C40:6     | 0.71                             | 15.72            | 12.61               | 10.69             | 15.88  |
| C40:5     |                                  |                  |                     | 4.06              |        |
| Total LPI |                                  |                  |                     |                   |        |
| Total PI  |                                  | 562.58           | 251.34              | 266.59            | 428.93 |

**D. Phosphatidylglycerol** (Data are ng phospholipid bound per mg nanoparticles. Blank cells indicate not detectable)

| Compound | Rat BALf<br>( $\mu\text{g/ml}$ ) | CeO <sub>2</sub> | Si-CeO <sub>2</sub> | BaSO <sub>4</sub> | ZnO    |
|----------|----------------------------------|------------------|---------------------|-------------------|--------|
| C16:1    |                                  |                  |                     |                   | 0.04   |
| C16:0    | 0.06                             | 1.06             | 0.77                | 0.61              | 1.10   |
| C18:3    |                                  |                  |                     |                   | 0.02   |
| C18:2    |                                  | 0.57             | 0.24                | 0.60              | 0.97   |
| C18:1    |                                  | 0.54             | 0.30                | 0.31              | 0.91   |
| C18:0    | 0.04                             | 0.48             | 0.26                | 0.25              | 0.61   |
| C22:6    |                                  |                  |                     |                   | 0.02   |
| C34:1    | 0.38                             | 18.47            | 17.16               | 11.79             | 51.94  |
| C36:5    |                                  | 18.62            | 19.65               | 10.35             | 36.21  |
| C36:4    | 0.81                             | 87.31            | 65.14               | 54.15             | 159.21 |

|           |      |        |        |        |        |
|-----------|------|--------|--------|--------|--------|
| C36:3     | 0.66 | 12.56  | 31.16  | 10.37  | 42.86  |
| C36:2     | 1.46 | 21.04  | 23.59  | 12.34  | 41.84  |
| C36:1     |      | 8.77   | 4.89   | 3.31   | 20.44  |
| C38:6     |      | 111.90 | 148.09 | 69.43  | 207.56 |
| C38:5     |      | 37.85  | 51.68  | 23.97  | 69.53  |
| C38:4     | 0.05 | 14.56  | 9.83   | 6.18   | 26.07  |
| Total LPG |      | 2.65   | 1.58   | 1.77   | 3.67   |
| Total PG  |      | 331.08 | 371.19 | 201.90 | 655.65 |

**E. Phosphatidylserine** (Data are ng phospholipid bound per mg nanoparticles. Blank cells indicate not detectable)

| Compound  | Rat BALf (µg/ml) | CeO <sub>2</sub> | Si-CeO <sub>2</sub> | BaSO <sub>4</sub> | ZnO    |
|-----------|------------------|------------------|---------------------|-------------------|--------|
| C18:0     |                  | 0.09             | 0.06                | 0.06              | 0.08   |
| C34:2     |                  | 2.74             | 0.82                | 1.21              | 2.56   |
| C34:1     | 0.65             | 9.16             | 5.95                | 5.85              | 12.34  |
| C34:0     |                  | 8.68             | 7.86                | 6.28              | 11.18  |
| C36:4     |                  | 0.88             | 0.44                | 0.63              | 1.22   |
| C36:3     |                  |                  |                     |                   | 1.05   |
| C36:2     |                  | 12.55            | 7.46                | 8.37              | 18.92  |
| C36:1     | 0.66             | 52.97            | 38.49               | 34.90             | 73.93  |
| C38:6     |                  |                  |                     |                   | 0.28   |
| C38:5     |                  | 0.43             |                     | 0.73              | 1.99   |
| C38:4     |                  | 10.04            | 6.00                | 6.75              | 12.76  |
| C38:3     |                  | 2.39             | 1.58                | 1.50              | 4.62   |
| C38:2     |                  | 1.04             |                     | 0.62              | 1.75   |
| C38:1     |                  | 2.23             | 1.10                | 1.15              | 2.41   |
| C40:7     |                  |                  |                     |                   | 0.31   |
| C40:6     |                  | 5.37             | 3.41                | 3.14              | 5.91   |
| C40:5     |                  | 1.86             | 1.77                | 1.61              | 3.22   |
| C40:4     |                  | 3.18             | 1.98                | 2.50              | 5.28   |
| Total LPS |                  | 0.09             | 0.06                | 0.06              | 0.08   |
| Total PS  |                  | 113.52           | 76.88               | 75.22             | 159.76 |

**F. Phosphatidic acid** (Data are ng phospholipid bound per mg nanoparticles. Blank cells indicate not detectable)

| Compound | Rat BALf (µg/ml) | CeO <sub>2</sub> | Si-CeO <sub>2</sub> | BaSO <sub>4</sub> | ZnO    |
|----------|------------------|------------------|---------------------|-------------------|--------|
| 18:0 LPA |                  | 28.09            | 16.71               | 10.76             | 22.08  |
| C32:0    |                  | 8.35             |                     | 2.54              | 2.15   |
| C36:0    |                  | 6.78             | 3.41                | 1.91              | 1.08   |
| C38:6    |                  | 80.72            | 35.04               | 37.82             | 29.57  |
| C38:5    | 0.26             | 2007.73          | 1070.24             | 845.50            | 630.26 |

|           |      |         |         |         |        |
|-----------|------|---------|---------|---------|--------|
| C38:4     | 0.05 | 143.95  | 93.28   | 66.29   | 49.60  |
| C40:6     | 0.04 | 211.13  | 79.26   | 74.28   | 59.17  |
| C40:5     |      | 116.76  | 52.14   | 39.77   | 30.36  |
| Total LPA |      | 28.09   | 16.71   | 10.76   | 22.08  |
| Total PA  |      | 2575.42 | 1333.37 | 1068.11 | 802.20 |

**G. Sphingomyelin** (Data are ng phospholipid bound per mg nanoparticles. Blank cells indicate not detectable)

| <b>Compound</b> | <b>Rat BALf<br/>(<math>\mu\text{g/ml}</math>)</b> | <b>CeO<sub>2</sub></b> | <b>Si-CeO<sub>2</sub></b> | <b>BaSO<sub>4</sub></b> | <b>ZnO</b> |
|-----------------|---------------------------------------------------|------------------------|---------------------------|-------------------------|------------|
| C32:0 SM        | 0.05                                              |                        |                           |                         |            |
| C34:0 SM        | 0.00                                              |                        |                           |                         |            |
| C36:1 SM        | 2.46                                              |                        |                           |                         |            |
| C36:0 SM        | 24.91                                             |                        |                           |                         |            |
| C38:2 SM        | 1.72                                              |                        |                           |                         |            |
| C38:1 SM        | 12.02                                             |                        |                           |                         |            |
| C38:0 SM        | 8.93                                              |                        |                           |                         |            |
| C40:3 SM        | 3.23                                              |                        |                           |                         |            |
| C42:4 SM        | 0.49                                              |                        |                           |                         |            |
| C42:3 SM        | 1.73                                              |                        |                           |                         |            |

**Figure S1.** A cryo-TEM image of rat bronchoalveolar lavage fluid showing large sheets of lipid bilayers in micron sizes covering multiple holes of the grid.

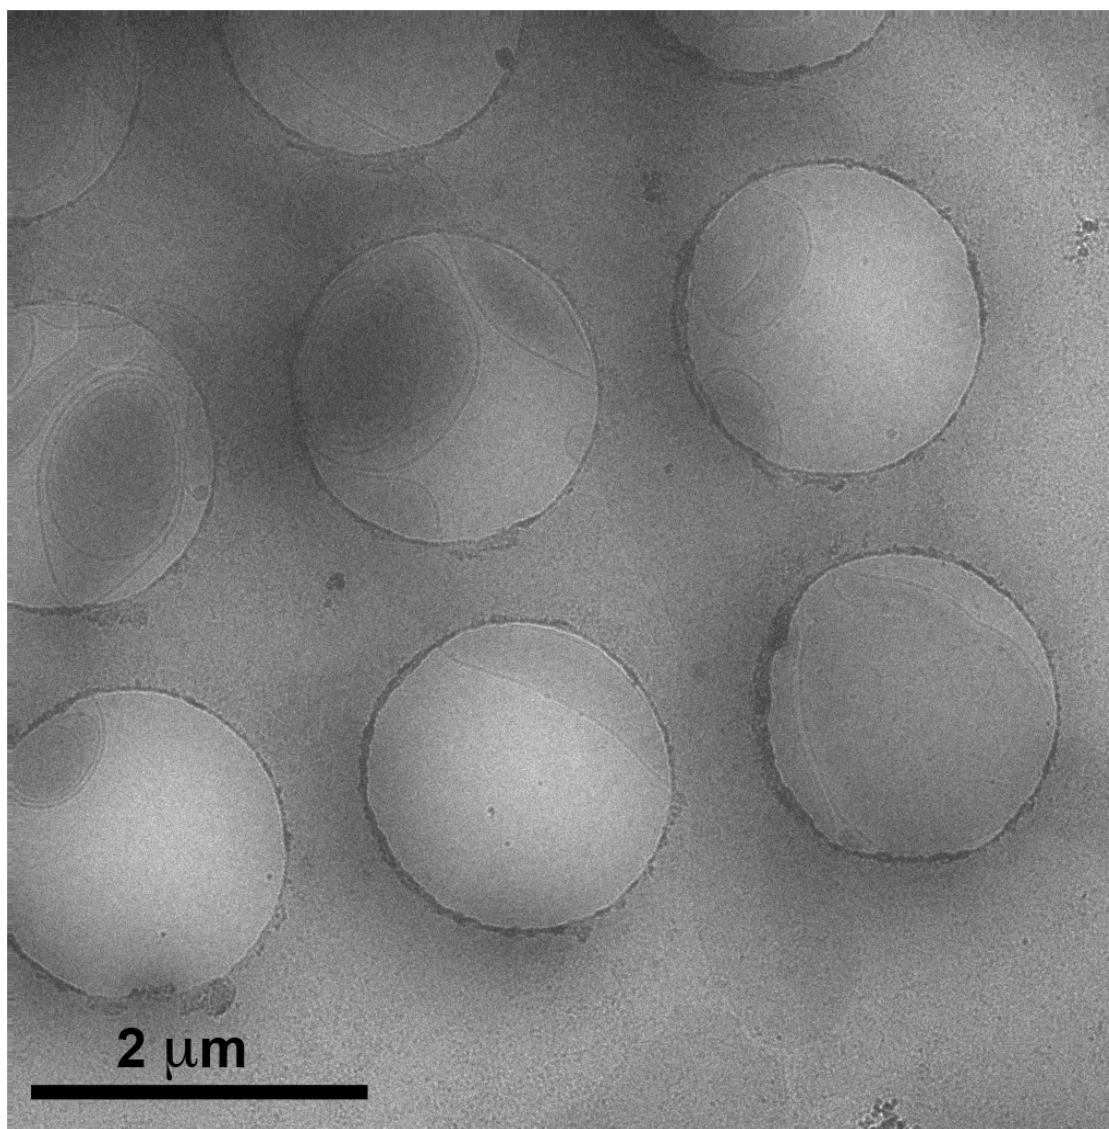

**Figure S2.** AFM height and phase contrast images of CeO<sub>2</sub> (**a, b**) and BaSO<sub>4</sub> (**c, d**) NPs post-incubation in 2:1 mixture of DPPC and DPPA lipids. Height images: CeO<sub>2</sub> (**a**) and BaSO<sub>4</sub> (**c**). Phase images: CeO<sub>2</sub> (**b**) and BaSO<sub>4</sub> (**d**).

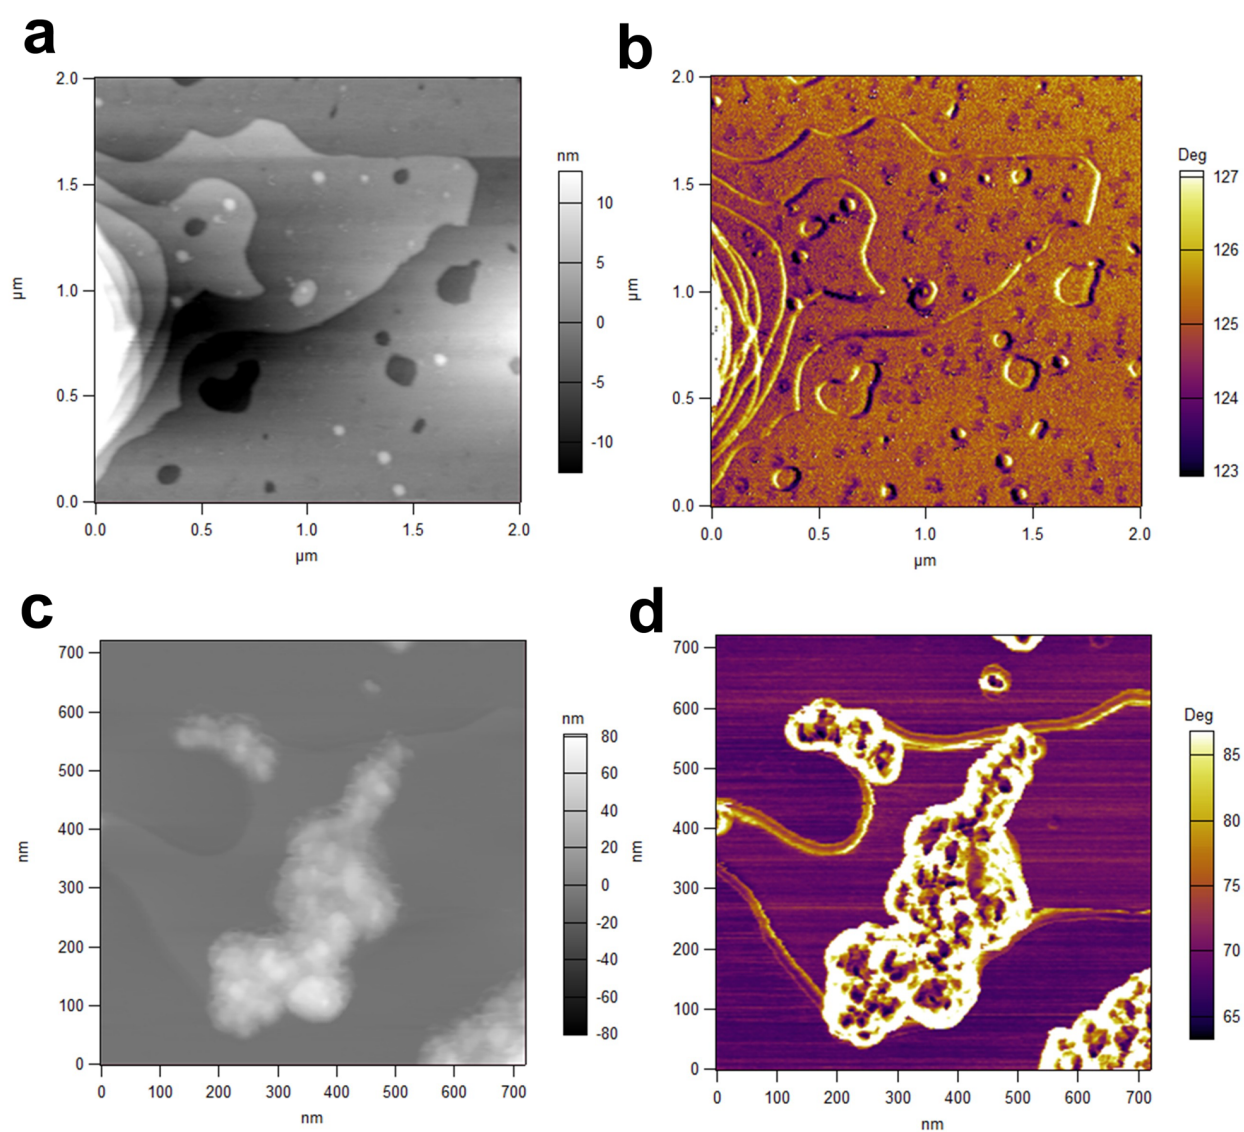

Supplement: NIHMS1018366-supplement-2.pdf [file NIHMS1018366-supplement-2.pdf]
